# Supplementary material for: Joint Exposure to Chemical and Nonchemical Neurodevelopmental Stressors in U.S. Women of Reproductive Age in NHANES
Source: Int J Environ Res Public Health. 2014 Apr 22;11(4):4384–401. doi: 10.3390/ijerph110404384 (PMC4024991; doi:10.3390/ijerph110404384)
Supplement: Supplementary File 1 — Supplementary Information (PDF, 98 KB) [file ijerph-11-04384-s001.pdf]

# Joint Exposure to Chemical and Nonchemical Neurodevelopmental Stressors in U.S. Women of Reproductive Age in NHANES

---

## 1. Methods

### 1.1. Allostatic Load (AL) Biomarkers

Details regarding measurement procedures are described within the following National Health and Nutrition Examination Survey (NHANES) manuals: *Anthropometry Procedures Manual* [1] for height and weight used in the calculation of body mass index (BMI), *Cardiovascular Fitness Procedures Manual* [2] for heart rate and blood pressures, and *Laboratory Procedure Manuals* for homocysteine in plasma [3], high density lipoprotein (HDL) and total cholesterol [4], glycohemoglobin in whole blood [5], albumin in refrigerated serum [6], and C-reactive protein in serum [7].

Clinical high risk cut-points are listed in Table S1. Cardiovascular markers included heart rate (pulse), systolic and diastolic blood pressure, and homocysteine. Heart rate was measured in beats per minute and the normal clinical range for all adults is 60–100 beats per minute according to the National Institute of Health (NIH) [8]; therefore the clinical high risk cut-point was >100 beats per minute. Mean blood pressure was calculated as follows: if only one measurement was available, this was the average; if two measurements were available, the first measurement was discarded and the second was used as the average; if more than two measurements were available, the first measurement was discarded and remaining measurements were averaged. We used only mean blood pressure readings to classify blood pressure as high or low risk regardless of the use of blood pressure medication. Clinical high risk values for blood pressure were >130 mmHg systolic and >85 mmHg diastolic according to HeartHealthyWomen.org [9], which is a joint project of the Cardiovascular Research Foundation, the Office on Women's Health of the Department of Health and Human Services, and WomenHeart: the National Coalition for Women with Heart Disease. Fasting homocysteine was measured in plasma and is considered to have a normal range of 5–15  $\mu\text{mol/L}$  [9]; therefore, the clinical high risk cut-point was >15  $\mu\text{mol/L}$ . Metabolic biomarkers included BMI, HDL and total cholesterol, and glycohemoglobin. High risk cholesterol levels were specific for females with HDL cholesterol levels < 50 mg/dL and total cholesterol levels  $\geq 200$  mg/dL considered high risk [9]. BMI  $\geq 25$  [9] and glycohemoglobin  $\geq 6.5\%$  [10] were considered high risk. Inflammatory biomarkers included C-reactive protein and albumin with levels  $\geq 1$  mg/dL [9] and  $\leq 3.4$  [8] considered high risk, respectively.

### 1.2. Sensitivity Analysis: Allostatic Load Score

For the empirical based AL (AL-Empirical), data from all women, including those excluded from the final analytical sample due to missing data for any of the 10 AL biomarkers, were used to estimate weighted percentiles for each biomarker (see Supplementary Information, Table S1). Biomarkers were

considered “high risk” if above the 75th percentile and the biomarker indicator variable (BIV) received a value of “1”, with the exception of HDL cholesterol and albumin for which higher values are deemed more health-protective. Therefore, these two biomarkers were considered “high risk” above the 25th percentile. BIVs for the empirical method were summed to calculate the AL-Empirical score. AL-Empirical score were categorized using the same approach that was used to categorize AL-Clinical scores (Equation 2, Tables S1 and S2).

### *1.3. Potential Confounders and Variable Classification*

We used univariate (each variable was included in the model as the only independent variable) and bivariate (race/ethnicity and one additional variable were included in the model as independent variables) analyses to examine the following variables as potential confounders of the association between an indicator of elevated neurodevelopmental toxicant (NDT) exposure and race/ethnicity: country of birth (United States vs. foreign; status of the head of household was used if participant was <18 years of age), age (years, continuous and categorical: 15–19, 20–28, 29–44), marital status (married or living with partner; never married; widowed, divorced, or separated; status of the head of household was used if participant was <18 years of age and never married), annual household income (<\$19,999; ≥\$19,999–<\$45,000, ≥\$45,000–<\$75,000; ≥\$75,000), annual family income (<\$14,999; ≥\$14,999–<\$35,000, ≥\$35,000–<\$75,000; ≥\$75,000), poverty-to-income ratio (continuous and categorical: <1; 1–<2; ≥2–<3; ≥3), highest educational attainment (less than high school or high school graduate; some college/associates or technical degree; college graduate or above; status of head of household was used if participant was <18 years of age), home owned or rented, smoking status (serum cotinine: ≤10 ng/mL = nonsmoker; >10 ng/mL = smoker), physical activity (combination of any activity daily and vigorous activity monthly: both, either, none), type of home (attached, detached), year home was built (<1940–1959, 1960–1977, 1978–1989, 1990–present), how many years lived in home (<1, 1–2, 3–5, 6–10, >10), iron status indicator (normal vs. abnormal). Abnormal iron status was defined as meeting any two of the following conditions: (1) serum ferritin < 15 ng/mL, (2) transferrin saturation < 16%, (3) red blood cell distribution width > 15%, (4) erythrocyte protoporphyrin > 50 µg/dL red blood cells [11–13].

**Table S1.** Descriptive statistics from individual allostatic load (AL) biomarkers, multisystem AL scores <sup>a</sup> for multiple approaches, and screening-level indicators of joint neurodevelopmental toxicant (NDT) exposure <sup>b</sup> to lead (Pb) and methyl mercury (MeHg), using multiple health reference values (HRVs) for Pb, among nonpregnant, reproductive-aged (15–44 years) survey participants from NHANES 2003–2004.

|                                                        | All Women        |          |          |           |      |      |
|--------------------------------------------------------|------------------|----------|----------|-----------|------|------|
|                                                        | HRV <sup>c</sup> | <i>n</i> | Range    | Quartiles |      |      |
|                                                        |                  |          |          | 25th      | 50th | 75th |
| Cardiovascular Markers                                 |                  |          |          |           |      |      |
| Heart Rate (beats/min) <sup>**</sup>                   | >100             | 1,250    | 44–128   | 68        | 76   | 84   |
| Mean Systolic BP (mm Hg) <sup>*,#</sup>                | ≥130             | 1,250    | 78–178   | 102       | 110  | 117  |
| Mean Diastolic BP (mm Hg) <sup>#</sup>                 | ≥85              | 1,250    | 24–116   | 62        | 67   | 74   |
| Homocysteine (μmol/L) <sup>**,#</sup>                  | >15              | 1,243    | 2.9–23.9 | 5.9       | 6.8  | 8.0  |
| Metabolic Markers                                      |                  |          |          |           |      |      |
| Body Mass Index (kg/m <sup>2</sup> ) <sup>*,**,#</sup> | ≥25              | 1,250    | 15–63    | 22        | 26   | 31   |
| HDL-Cholesterol (mg/dL) <sup>**,#</sup>                | <50              | 1,224    | 23–123   | 46        | 56   | 66   |
| Total Cholesterol (mg/dL) <sup>*</sup>                 | ≥200             | 1,224    | 94–650   | 160       | 182  | 211  |
| Glycohemoglobin (%) <sup>*,**</sup>                    | ≥6.5             | 1,246    | 4.2–13.2 | 5.0       | 5.1  | 5.3  |
| Immune Markers                                         |                  |          |          |           |      |      |
| C-reactive protein (mg/dL) <sup>**</sup>               | ≥1.0             | 1,233    | 0.01–7.9 | 0.06      | 0.18 | 0.49 |
| Albumin (g/dL) <sup>*,#</sup>                          | ≤3.4             | 1,218    | 3.2–5.2  | 4.0       | 4.2  | 4.4  |
| NDTs                                                   |                  |          |          |           |      |      |
| Pb (μg/dL) <sup>*,**</sup>                             | 1.8              | 1,250    | 0.2–23.9 | 0.7       | 0.9  | 1.3  |
| MeHg (μg/L)                                            | 5.8              | 1,250    | 0.1–30.7 | 0.4       | 0.8  | 1.4  |
| Multisystem AL <sup>a</sup>                            |                  |          |          |           |      |      |
| AL-Clinical <sup>*,**</sup>                            |                  | 1,162    | 0–6      | 0         | 1    | 2    |
| AL-Empirical <sup>*,#</sup>                            |                  | 1,410    | 0–8      | 1         | 2    | 3    |

Table S1. Cont.

| HRV <sup>c</sup>                                                 | All Women |          |           |      |      |
|------------------------------------------------------------------|-----------|----------|-----------|------|------|
|                                                                  | <i>n</i>  | Range    | Quartiles |      |      |
|                                                                  |           |          | 25th      | 50th | 75th |
| Screening-Level Indicators of NDT Exposure <sup>b</sup>          |           |          |           |      |      |
| HQ <sub>PB</sub> <sup>*, **</sup>                                | 1,250     | 0.1–13.7 | 0.4       | 0.5  | 0.7  |
| HQ <sub>PB</sub> (lower HRV <sub>Pb</sub> )<br><sup>*, **</sup>  | 1,250     | 0.2–23.9 | 0.7       | 0.9  | 1.3  |
| HQ <sub>Pb</sub> (higher HRV <sub>Pb</sub> )<br><sup>*, **</sup> | 1,250     | 0.04–4.8 | 0.1       | 0.2  | 0.3  |
| HQ <sub>MeHg</sub>                                               | 1,250     | 0.02–5.3 | 0.07      | 0.1  | 0.2  |
| HI <sub>NDT</sub> <sup>*, **</sup>                               | 1,250     | 0.1–13.7 | 0.5       | 0.7  | 1.0  |
| HI <sub>NDT</sub> (lower HRV <sub>Pb</sub> )<br><sup>*, **</sup> | 1,250     | 0.2–24.0 | 0.8       | 1.1  | 1.6  |
| HI <sub>NDT</sub> (higher HRV <sub>Pb</sub> )<br><sup>*</sup>    | 1,250     | 0.06–5.5 | 0.3       | 0.4  | 0.5  |

Notes: HQ = hazard quotient; HI = hazard index. <sup>a</sup> AL scores were calculated by summing the number of 10 biomarkers that were above clinical or empirical high risk cut-points for AL-Clinical and AL-Empirical, respectively. <sup>b</sup> HQs were calculated by dividing biomarker concentrations by chemical-specific HRVs, HI<sub>NDTs</sub> were calculated by summing the individual HQs for Pb and MeHg. <sup>c</sup> AL biomarkers = Clinical high risk cut-points, MeHg = EPA's blood equivalent of the RfD, Pb = maternal blood equivalent (1.76 µg/dL) of the cord blood literature derived value [14] 1.0 µg/dL and 5.0 µg/dL were used as the lower and higher HRV<sub>Pb</sub>, respectively. \* Denotes statistically significant mean differences ( $p < 0.05$ ) between African Americans and Caucasians. \*\* Denotes statistically significant differences ( $p < 0.05$ ) between Mexican Americans and Caucasians. # Denotes statistically significant differences ( $p < 0.05$ ) between African Americans and Mexican Americans.

**Table S2.** Descriptive statistics from individual allostatic load (AL) biomarkers, multisystem AL scores <sup>a</sup> for multiple approaches, and screening-level indicators of joint neurodevelopmental toxicant (NDT) exposure <sup>b</sup> to lead (Pb) and methyl mercury (MeHg), using multiple health reference values (HRVs) for Pb, among nonpregnant, reproductive-aged (15–44 years) survey participants from NHANES 2003–2004 by race/ethnicity.

|                                               | Caucasians |          |           |      |      | African Americans |          |           |      |      | Mexican Americans |          |           |      |      |
|-----------------------------------------------|------------|----------|-----------|------|------|-------------------|----------|-----------|------|------|-------------------|----------|-----------|------|------|
|                                               | <i>n</i>   | Range    | Quartiles |      |      | <i>n</i>          | Range    | Quartiles |      |      | <i>n</i>          | Range    | Quartiles |      |      |
|                                               |            |          | 25th      | 50th | 75th |                   |          | 25th      | 50th | 75th |                   |          | 25th      | 50th | 75th |
| Cardiovascular Markers                        |            |          |           |      |      |                   |          |           |      |      |                   |          |           |      |      |
| Heart Rate (beats/min) **                     | 557        | 44–114   | 70        | 76   | 84   | 389               | 48–128   | 68        | 76   | 84   | 329               | 50–106   | 66        | 72   | 82   |
| Mean Systolic BP (mm Hg) **, #                | 555        | 78–158   | 102       | 109  | 116  | 381               | 82–173   | 105       | 114  | 123  | 324               | 83–178   | 102       | 109  | 115  |
| Mean Diastolic BP (mm Hg) #                   | 555        | 31–103   | 62        | 67   | 74   | 381               | 36–105   | 62        | 68   | 77   | 324               | 24–116   | 60        | 66   | 73   |
| Homocysteine (μmol/L) **, #                   | 548        | 3.4–23.9 | 6.0       | 6.9  | 8.2  | 371               | 2.9–14.9 | 5.7       | 6.8  | 8.0  | 324               | 3.2–15.5 | 5.4       | 6.2  | 7.3  |
| Metabolic Markers                             |            |          |           |      |      |                   |          |           |      |      |                   |          |           |      |      |
| Body Mass Index (kg/m <sup>2</sup> ) *, **, # | 566        | 15–54    | 21        | 25   | 30   | 387               | 15–63    | 24        | 30   | 35   | 335               | 16–54    | 23        | 27   | 33   |
| HDL-Cholesterol (mg/dL) **, #                 | 538        | 25–123   | 47        | 57   | 67   | 367               | 27–118   | 46        | 55   | 65   | 322               | 23–107   | 44        | 52   | 61   |
| Total Cholesterol (mg/dL) *                   | 538        | 99–650   | 161       | 183  | 213  | 364               | 102–305  | 157       | 181  | 202  | 322               | 94–306   | 156       | 180  | 206  |
| Glycohemoglobin (%) *, **                     | 549        | 4.5–9.2  | 4.9       | 5.1  | 5.2  | 371               | 4.2–9.7  | 5.1       | 5.3  | 5.5  | 326               | 4.5–13.2 | 5.1       | 5.2  | 5.4  |
| Immune Markers                                |            |          |           |      |      |                   |          |           |      |      |                   |          |           |      |      |
| C-reactive protein (mg/dL) **                 | 543        | 0.01–4.7 | 0.06      | 0.2  | 0.4  | 368               | 0.01–6.5 | 0.07      | 0.3  | 0.7  | 322               | 0.01–7.9 | 0.09      | 0.3  | 0.7  |
| Albumin (g/dL) *, #                           | 535        | 3.3–5.2  | 4.0       | 4.3  | 4.5  | 362               | 3.2–4.9  | 3.8       | 4.0  | 4.2  | 321               | 3.3–5.0  | 4.0       | 4.2  | 4.5  |
| NDTs                                          |            |          |           |      |      |                   |          |           |      |      |                   |          |           |      |      |
| Pb (μg/dL) *, **                              | 551        | 0.2–5.0  | 0.6       | 0.9  | 1.2  | 373               | 0.2–9.5  | 0.8       | 1.1  | 1.4  | 326               | 0.2–23.9 | 0.7       | 1.2  | 1.7  |
| MeHg (μg/L)                                   | 551        | 0.1–15.6 | 0.4       | 0.7  | 1.4  | 373               | 0.1–8.2  | 0.6       | 0.9  | 1.7  | 326               | 0.1–30.7 | 0.4       | 0.6  | 1.1  |
| Multisystem AL <sup>a</sup>                   |            |          |           |      |      |                   |          |           |      |      |                   |          |           |      |      |
| AL-Clinical *, **                             | 572        | 0–5      | 0         | 1    | 2    | 396               | 0–6      | 1         | 2    | 2    | 338               | 0–5      | 1         | 2    | 2    |
| AL-Empirical *, #                             | 572        | 0–8      | 1         | 2    | 3    | 396               | 0–8      | 2         | 3    | 4    | 338               | 0–7      | 1         | 2    | 4    |

Table S2. Cont.

|                                                              | Caucasians |          |           |      |      | African Americans |          |           |      |      | Mexican Americans |          |           |      |      |
|--------------------------------------------------------------|------------|----------|-----------|------|------|-------------------|----------|-----------|------|------|-------------------|----------|-----------|------|------|
|                                                              | <i>n</i>   | Range    | Quartiles |      |      | <i>n</i>          | Range    | Quartiles |      |      | <i>n</i>          | Range    | Quartiles |      |      |
|                                                              |            |          | 25th      | 50th | 75th |                   |          | 25th      | 50th | 75th |                   |          | 25th      | 50th | 75th |
| Screening-Level Indicators of NDT Exposure <sup>b</sup>      |            |          |           |      |      |                   |          |           |      |      |                   |          |           |      |      |
| HQ <sub>PB</sub> <sup>*,**</sup>                             | 551        | 0.1–2.9  | 0.3       | 0.5  | 0.7  | 373               | 0.1–5.4  | 0.5       | 0.6  | 0.8  | 326               | 0.1–13.7 | 0.4       | 0.7  | 1.0  |
| HQ <sub>PB</sub> (lower HRV <sub>Pb</sub> ) <sup>*,**</sup>  | 551        | 0.2–5.0  | 0.6       | 0.9  | 1.2  | 373               | 0.2–9.5  | 0.8       | 1.1  | 1.4  | 326               | 0.2–23.9 | 0.7       | 1.2  | 1.7  |
| HQ <sub>Pb</sub> (higher HRV <sub>Pb</sub> ) <sup>*,**</sup> | 551        | 0.04–1.0 | 0.1       | 0.2  | 0.2  | 373               | 0.04–1.9 | 0.2       | 0.2  | 0.3  | 326               | 0.04–4.8 | 0.1       | 0.2  | 0.3  |
| HQ <sub>MeHg</sub>                                           | 551        | 0.02–2.7 | 0.07      | 0.1  | 0.2  | 373               | 0.02–1.4 | 0.1       | 0.2  | 0.3  | 326               | 0.02–5.3 | 0.07      | 0.1  | 0.2  |
| HI <sub>NDT</sub> <sup>*,**</sup>                            | 551        | 0.1–3.4  | 0.5       | 0.7  | 1.0  | 373               | 0.2–5.9  | 0.6       | 0.8  | 1.1  | 326               | 0.2–13.7 | 0.5       | 0.8  | 1.2  |
| HI <sub>NDT</sub> (lower HRV <sub>Pb</sub> ) <sup>*,**</sup> | 551        | 0.2–5.1  | 0.8       | 1.1  | 1.5  | 373               | 0.3–9.6  | 1.0       | 1.3  | 1.7  | 326               | 0.3–24.0 | 0.9       | 1.3  | 1.9  |
| HI <sub>NDT</sub> (higher HRV <sub>Pb</sub> ) <sup>*</sup>   | 551        | 0.06–2.9 | 0.2       | 0.3  | 0.5  | 373               | 0.08–2.8 | 0.3       | 0.4  | 0.6  | 326               | 0.08–5.5 | 0.2       | 0.4  | 0.5  |

Notes: HQ = hazard quotient; HI = hazard index. <sup>a</sup> AL scores were calculated by summing the number of 10 biomarkers that were above clinical or empirical high risk cut-points for AL-Clinical and AL-Empirical, respectively. <sup>b</sup> HQs were calculated by dividing biomarker concentrations by chemical-specific HRVs, HI<sub>NDTs</sub> were calculated by summing the individual HQs for Pb and MeHg. <sup>c</sup> AL biomarkers = Clinical high risk cut-points, MeHg = EPA's blood equivalent of the RfD, Pb = maternal blood equivalent (1.76 µg/dL) of the cord blood literature derived value [14] 1.0 µg/dL and 5.0 µg/dL were used as the lower and higher HRV<sub>Pb</sub>, respectively. \* Denotes statistically significant mean differences ( $p < 0.05$ ) between African Americans and Caucasians. \*\* Denotes statistically significant differences ( $p < 0.05$ ) between Mexican Americans and Caucasians. # Denotes statistically significant differences ( $p < 0.05$ ) between African Americans and Mexican Americans.

**Table S3.** Unadjusted and adjusted <sup>a</sup> odds ratios (with 95% Wald confidence intervals) for the association between elevated neurodevelopmental toxicant exposure <sup>b</sup> and race/ethnicity among nonpregnant, reproductive-aged (15–44 years) survey participants from NHANES 2003–2004 stratified by sensitivity analyses using different health reference values (HRVs) for lead (Pb) <sup>b</sup> and different approaches for calculating allostatic load (AL) scores <sup>c</sup>.

|                                  |                     | Caucasians | African Americans |                 |                   | Mexican Americans |                |                  |
|----------------------------------|---------------------|------------|-------------------|-----------------|-------------------|-------------------|----------------|------------------|
|                                  |                     |            | HRV Pb (1.76)     | HRV Pb (1.0)    | HRV Pb (5.0)      | HRV Pb (1.76)     | HRV Pb (1.0)   | HRV Pb (5.0)     |
| <b>Univariate</b>                |                     | REF        | 1.8 (1.1, 2.8)    | 2.1 (1.4, 3.2)  | 1.3 (0.6, 3.3)    | 1.9 (1.2, 2.9)    | 1.6 (1.1, 2.5) | 1.4 (0.5, 3.5)   |
| <b>Multivariate <sup>b</sup></b> |                     | REF        | 2.2 (1.4, 3.3)    | 2.6 (1.6, 4.4)  | 1.5 (0.6, 3.6)    | 1.4 (0.7, 2.6)    | 1.3 (0.9, 1.9) | 0.7 (0.2, 1.9)   |
| <b>AL-Clinical</b>               | <b>Low</b>          | REF        | 1.2 (0.5, 2.7)    | 1.0 (0.3, 2.6)  | 1.6 (0.4, 6.6)    | 0.8 (0.2, 4.1)    | 1.1 (0.5, 2.4) | 0.6 (0.1, 2.4)   |
|                                  | <b>Intermediate</b> | REF        | 2.7 (1.6, 4.5)    | 4.2 (1.9, 9.4)  | 1.3 (0.4, 4.5)    | 1.8 (0.8, 4.1)    | 1.4 (0.9, 2.4) | 2.3 (0.5, 9.5)   |
|                                  | <b>High</b>         | REF        | 4.3 (2.0, 9.5)    | 3.4 (1.5, 7.6)  | 8.3 (0.9, 72.8)   | 4.2 (1.3, 14.1)   | 2.2 (1.0, 4.6) | 2.9 (0.7, 11.4)  |
|                                  | <b>Low</b>          | REF        | 1.1 (0.2, 6.7)    | 1.5 (0.4, 5.9)  | 1.1 (0.1, 9.9)    | 0.9 (0.1, 6.3)    | 1.5 (0.6, 3.9) | 5.3 (0.2, 157.6) |
| <b>AL-Empirical</b>              | <b>Intermediate</b> | REF        | 2.1 (1.3, 3.3)    | 2.3 (1.3, 3.9)  | 0.6 (0.2, 1.5)    | 1.4 (0.6, 3.4)    | 1.1 (0.6, 2.0) | 0.7 (0.2, 2.8)   |
|                                  | <b>High</b>         | REF        | 3.3 (1.5, 7.1)    | 6.7 (2.4, 19.0) | 39.0 (3.1, 497.4) | 1.9 (0.7, 5.1)    | 2.7 (1.5, 4.9) | 0.2 (0.008, 4.3) |

Notes: Results highlighted in aqua are the main analysis results. <sup>a</sup> Adjusted for age, country of birth, education, smoking status, iron status. <sup>b</sup> Elevated neurodevelopmental toxicant exposure was defined as having a hazard index for joint lead and methyl mercury greater than one (HINDT > 1). The hazard index was calculated by summing individual hazard quotients for lead and methyl mercury (Equation 1). Hazard quotients were calculated by dividing blood concentrations of lead and methyl mercury by 1.76 µg/dL and 5.8 µg/L, respectively. The lower HRV for Pb was 1.0 µg/dL [15] and the higher HRV for Pb was 5.0 µg/dL [16]. <sup>c</sup> AL scores were calculated by summing the number of 10 biomarkers that were above clinical or empirical high risk cut-points for AL-Clinical and AL-Empirical, respectively. Both AL approaches were categorized based on the distribution of AL scores (AL-Clinical: low = 0, intermediate = 1–2, high = 3–6; AL-Empirical: low = 0, intermediate = 1–3, high = 4–8).

**Table S4.** Adjusted odds ratios (ORs) and 95% confidence intervals (CIs) for the association between elevated neurodevelopmental toxicant exposure <sup>a</sup> and race/ethnicity stratified by allostatic load <sup>b</sup> among nonpregnant, reproductive-aged (15–44 years) survey participants from NHANES 2003–2004 using 2-year sample weights adjusted for race/ethnicity-age-specific birth rates.

|                                        | OR (95% CI)    |                                              |                       |                                |
|----------------------------------------|----------------|----------------------------------------------|-----------------------|--------------------------------|
|                                        | Multivariate   | Multivariate by Allostatic Load <sup>b</sup> |                       |                                |
|                                        |                | <i>n</i> = 1,181                             | Low<br><i>n</i> = 316 | Intermediate<br><i>n</i> = 609 |
| Race/Ethnicity                         |                |                                              |                       |                                |
| Caucasian                              | REF            | REF                                          | REF                   | REF                            |
| African American                       | 1.7 (1.0, 3.0) | 1.3 (0.5, 3.3)                               | 1.7 (0.8, 3.4)        | 3.2 (1.2, 8.8)                 |
| Mexican American                       | 1.1 (0.5, 2.4) | 1.3 (0.2, 10.0)                              | 1.0 (0.3, 3.0)        | 1.4 (0.2, 9.6)                 |
| Country of Birth                       |                |                                              |                       |                                |
| United States                          | REF            | REF                                          | REF                   | REF                            |
| Foreign                                | 3.4 (1.7, 6.8) | 8.0 (1.9, 34.0)                              | 2.7 (1.4, 5.1)        | 3.0 (0.4, 22.7)                |
| Age (years)                            |                |                                              |                       |                                |
| 15–19                                  | REF            | REF                                          | REF                   | REF                            |
| 20–28                                  | 1.9 (1.1, 3.0) | 2.5 (1.0, 6.1)                               | 1.5 (0.7, 3.2)        | 16.0 (1.7, 152.8)              |
| 29–44                                  | 3.6 (2.7, 4.7) | 6.6 (2.5, 17.1)                              | 3.6 (2.0, 6.5)        | 23.0 (3.0, 177.0)              |
| Highest Education <sup>c</sup>         |                |                                              |                       |                                |
| Less than high school graduate/GED     | 1.1 (0.6, 1.9) | 2.0 (0.6, 7.1)                               | 1.0 (0.4, 2.3)        | 0.7 (0.1, 4.7)                 |
| High School graduate/GED               | 0.7 (0.4, 1.2) | 1.4 (0.3, 7.1)                               | 0.5 (0.3, 0.9)        | 0.5 (0.05, 4.7)                |
| Some college/AA degree                 | 0.4 (0.2, 0.8) | 1.3 (0.4, 4.0)                               | 0.2 (0.1, 0.5)        | 0.3 (0.1, 1.9)                 |
| College graduate or above              | REF            | REF                                          | REF                   | REF                            |
| Smoking Status (serum cotinine)        |                |                                              |                       |                                |
| Nonsmoker (≤10 ng/mL)                  | REF            | REF                                          | REF                   | REF                            |
| Smoker (>10 ng/mL)                     | 2.0 (1.3, 3.2) | 2.4 (0.8, 6.7)                               | 1.9 (0.9, 3.8)        | 2.1 (0.6, 7.9)                 |
| Iron Deficiency Indicator <sup>d</sup> |                |                                              |                       |                                |
| Normal                                 | REF            | REF                                          | REF                   | REF                            |
| Abnormal                               | 0.6 (0.4, 1.0) | 0.5 (0.2, 1.2)                               | 0.7 (0.5, 1.1)        | 0.7 (0.3, 1.4)                 |

Notes: <sup>a</sup> Elevated neurodevelopmental toxicant exposure was defined as having a hazard index for joint lead and methyl mercury greater than one ( $HI_{NDT} > 1$ ). The hazard index was calculated by summing individual hazard quotients for lead and methyl mercury. Hazard quotients were calculated by dividing blood concentrations of lead and methyl mercury by 1.76  $\mu\text{g/dL}$  and 5.8  $\mu\text{g/L}$ , respectively. <sup>b</sup> Allostatic load was used as a surrogate of chronic stress and was estimated based on the categorical classification of allostatic load scores (0 = Low; 1–2 = Intermediate;  $> 2$  = High) calculated by summing the number of 10 biomarkers above clinical high risk criteria (Equation 2). <sup>c</sup> Head of household status was used if participant was  $< 18$  years of age. <sup>d</sup> Iron status was determined to abnormal if any two of the following conditions were met: (1) serum ferritin  $< 15$  ng/mL, (2) transferrin saturation  $< 16\%$ , (3) red blood cell distribution width  $> 15\%$ , (4) erythrocyte protoporphyrin  $> 50$   $\mu\text{g/dL}$  red blood cells.

## References

1. Centers for Disease Control and Prevention (CDC). National Health and Nutrition Examination Survey: Anthropometry Procedures Manual; CDC: Atlanta, GA, USA, 2004.
2. Centers for Disease Control and Prevention (CDC). *National Health and Nutrition Examination Survey: Cardiovascular Fitness Procedures Manual*; CDC National Center for Health Statistics: Atlanta, GA, USA, 2004.
3. Centers for Disease Control and Prevention (CDC). *Laboratory Procedure Manual: Total Homocysteine (tHcy) in Plasma. NHANES 2003–2004*; CDC National Center for Health Statistics: Atlanta, GA, USA, 2005.
4. Centers for Disease Control and Prevention (CDC). *Laboratory Procedure Manual: Total Cholesterol, HDL-Cholesterol, Triglycerides, and LDL-Cholesterol. NHANES 2003–2004*; CDC National Center for Health Statistics: Atlanta, GA, USA, 2013.
5. Centers for Disease Control and Prevention (CDC). *Glycohemoglobin in Blood. NHANES 2003–2004*; CDC National Center for Health Statistics: Atlanta, GA, USA, 2005.
6. Centers for Disease Control and Prevention (CDC). *Laboratory Procedure Manual: Albumin in Refrigerated Serum. NHANES 2003–2004*; CDC National Center for Health Statistics: Atlanta, GA, USA, 2005.
7. Centers for Disease Control and Prevention (CDC). *Laboratory Procedure Manual: C-Reactive Protein in Serum. NHANES 2003–2004*; CDC National Center for Health Statistics: Atlanta, GA, USA, 2000.
8. MedlinePlus. *NLM Pulse*; U.S. National Library of Medicine: Bethesda, MD, USA, 2013.
9. National Institutes of Health (NIH). *The Healthy Heart Handbook for Women*; No. 07–2720; NIH: Bethesda, MD, USA, 2007.
10. American Diabetes Association. Executive summary: Standards of medical care in diabetes—2013. *Diabetes Care* **2013**, *36*, S4–S10.
11. World Health Organization (WHO). Iron Deficiency Anaemia: Assessment, Prevention, and Control., A Guide for Programme Managers; WHO: Geneva, Switzerland, 2001.
12. Centers for Disease Control and Prevention (CDC). Iron-Status Indications. National Report on Biochemical Indicators of Diet and Nutrition in the U.S. Population 1999–2002; CDC: Atlanta, GA, USA, 2008.
13. McClung, J.; Marchitelli, L.; Friedl, K.; Young, A. Prevalence of iron deficiency and iron deficiency anemia among three populations of female military personnel in the US Army. *J. Am. Coll. Nutr.* **2006**, *25*, 64–69.
14. Jedrychowski, W.; Perera, F.; Jankowski, J.; Mrozek-Budzyn, D.; Mroz, E.; Flak, E.; Edwards, S.; Skarupa, A.; Lisowska-Miszczuk, I. Gender specific differences in neurodevelopmental effects of prenatal exposure to very low-lead levels: The prospective cohort study in three-year olds. *Early Hum. Dev.* **2009**, *85*, 503–510.
15. Carlisle, J.C.; Dowling, K.C.; Siegel, D.M.; Alexeeff, G.V. A blood lead benchmark for assessing risks from childhood lead exposure. *J. Environ. Sci Health A* **2009**, *44*, 1200–1208.

16. Centers for Disease Control and Prevention (CDC). *What Do Parents Need to Know to Protect Their Children?* CDC: Atlanta, GA, USA, 2012.

© 2014 by the authors; licensee MDPI, Basel, Switzerland. This article is an open access article distributed under the terms and conditions of the Creative Commons Attribution license (<http://creativecommons.org/licenses/by/3.0/>).
